# Supplementary material for: The Influence of Environmental Disclosure Quality on Analyst Coverage in Malaysia Based on Disclosures in Corporate Annual Reports
Source: Research Square preprint supplement (doi:10.21203/rs.3.rs-8848307/v1), 2026-02-23
Supplement: Supplementary file 1 [file 90f7bed7714bed1caf409312.docx]

**Table 1: Variable Measurements**

| Variable | Description | Measurement |
| --- | --- | --- |
| **Dependent variable:** | |  |
| AF | Analyst coverage | Number of analyst following in a year |
| **Independent variables:** | |  |
| EDQ1 | Environmental pollution control | 0 = Items are not disclosed  1 = Items are disclosed in general terms  2 = Items are disclosed in specific terms but not in quantitative terms  3 = Items are disclosed in quantitative but not in monetary terms  4 = Items are disclosed in both quantitative and monetary terms |
| EDQ2 | Sustainable development reporting |
| EDQ3 | Environmental management |
| EDQ4 | Environmental awards, objectives and other achievement |
| EDQ5 | Environmental related financial information |
| EDQ6 | Stakeholder engagement |
| EDQ7 | Negative information and information relating to laws and regulation |
| EDQ8 | Land remediation and contamination |
| EDQ9 | Other environmental related disclosure |
| EDQSCORE | Environmental disclosure quality index | Ranges from 0 percent-100 percent |
| PERIOD | Covid-19 Pandemic | 1 = Pre-pandemic period where year is 2013-2018  2 = Pandemic period where year is 2019-2020  3 = Post-pandemic period where year is 2021-2022 |
|  |  |  |
| **Control variables:** | |  |
| FLU | Fluctuation of returns on share of the firm | The statistical standard deviation estimated based on price target forecasted by analyst |
| SIZE | Firm size | Market capitalization of equity, scaled using logarithm |
| OWNS | Directors’ ownership | Percentage of firm’s shares held by directors |
| INOWN | Institutional ownership | Percentage of shares held by institutional investors |
| NSEG | Number of business segments | Number of business segments as defined by MFRS 8 Operating Segments |
| HSALES | Herfindahl (H) index on sales | ∑ (Sales per segment/Total sales)2 |
| HASSET | Herfindahl (H) index on assets | ∑ (Asset per segment/Total assets)2 |
| IND | Industry | Coded 1 for each specific industry classification, 0 for otherwise |

Source: Authors’ own calculations.

**Table 2: Sample Reconciliation**

| Details | n |
| --- | --- |
| Non-financial firms from Bursa Malaysia listed throughout 2013-2022 | 523 |
| Negative book value of equity | (2) |
| Change of accounting year-end | (59) |
| Change of industrial sector | (10) |
| Firm in PN 17 – Financial distress | (3) |
| Missing data – Shareholder information | (2) |
| Missing data – Segmental detail | (2) |
| Initial sample | 445 |
| Firm-year (10 years) | 4,450 |
| Outlier - R-studentized >|2| | (326) |
| Unbalanced panel – drop if _N<10 | (294) |
| Final sample | 3830 |

Source: Authors’ own calculations.

**Table 3: Descriptive Statistics**

| n=3,830 | Mean | Standard Deviation | Minimum | Maximum |
| --- | --- | --- | --- | --- |
| **Dependent variable:** |  |  |  |  |
| AF | 0.960 | 2.230 | 0 | 19 |
| **Independent variables:**  EDQ1 | 0.963 | 0.999 | 0 | 3 |
| EDQ2 | 2.093 | 0.880 | 0 | 4 |
| EDQ3 | 1.667 | 1.114 | 0 | 4 |
| EDQ4 | 0.576 | 0.899 | 0 | 3 |
| EDQ5 | 0.113 | 0.611 | 0 | 4 |
| EDQ6 | 0.338 | 0.679 | 0 | 4 |
| EDQ7 | 0.005 | 0.103 | 0 | 4 |
| EDQ8 | 0.001 | 0.046 | 0 | 2 |
| EDQ9 | 0.068 | 0.364 | 0 | 2 |
| EDQSCORE | 16.179 | 10.238 | 0 | 55.556 |
| PERIOD | 1.600 | 0.800 | 1 | 3 |
| **Control variables:** |  |  |  |  |
| FLU | 0.064 | 0.274 | 0 | 6.01 |
| SIZE | 5.476 | 1.385 | 0.239 | 11.907 |
| OWNS | 37.731 | 13.175 | 0 | 89.430 |
| INOWN | 10.979 | 16.919 | 0 | 98.57 |
| NESG | 2.942 | 1.514 | 1 | 9 |
| HSALES | 0.753 | 0.235 | 0.100 | 1 |
| HASSET | 0.65 | 0.269 | 0.100 | 1 |

Source: Authors’ own calculations.

**Table 4: Pearson Correlation Matrix**

|  | AF | EDQ1 | EDQ2 | EDQ3 | EDQ4 | EDQ5 | EDQ6 | EDQ7 | EDQ8 | EDQ9 | EDQ  SCORE | FLU | SIZE | OWNS | IOWN | NSEG | HSALES | HASSET |
| --- | --- | --- | --- | --- | --- | --- | --- | --- | --- | --- | --- | --- | --- | --- | --- | --- | --- | --- |
| AF | 1 |  |  |  |  |  |  |  |  |  |  |  |  |  |  |  |  |  |
| EDQ1 | 0.181*** | 1 |  |  |  |  |  |  |  |  |  |  |  |  |  |  |  |  |
| EDQ2 | 0.136*** | 0.582*** | 1 |  |  |  |  |  |  |  |  |  |  |  |  |  |  |  |
| EDQ3 | 0.118*** | 0.652*** | 0.773*** | 1 |  |  |  |  |  |  |  |  |  |  |  |  |  |  |
| EDQ4 | 0.245*** | 0.341*** | 0.323*** | 0.356*** | 1 |  |  |  |  |  |  |  |  |  |  |  |  |  |
| EDQ5 | 0.011 | 0.137*** | 0.253*** | 0.183*** | 0.085*** | 1 |  |  |  |  |  |  |  |  |  |  |  |  |
| EDQ6 | 0.163*** | 0.378*** | 0.381*** | 0.378*** | 0.227*** | 0.169*** | 1 |  |  |  |  |  |  |  |  |  |  |  |
| EDQ7 | 0.032* | 0.040** | 0.044*** | 0.037** | 0.037** | -0.009 | 0.073*** | 1 |  |  |  |  |  |  |  |  |  |  |
| EDQ8 | -0.010 | 0.024 | 0.011 | -0.015 | -0.015 | -0.004 | -0.012 | -0.001 | 1 |  |  |  |  |  |  |  |  |  |
| EDQ9 | -0.039** | 0.079*** | 0.062*** | 0.068*** | 0.031* | 0.019 | -0.005 | -0.009 | -0.004 | 1 |  |  |  |  |  |  |  |  |
| EDQSCORE | 0.206*** | 0.792*** | 0.828*** | 0.858*** | 0.581*** | 0.372*** | 0.576*** | 0.083*** | 0.02 | 0.165*** | 1 |  |  |  |  |  |  |  |
| FLU | 0.500*** | 0.126*** | 0.126*** | 0.094*** | 0.140*** | 0.001 | 0.117*** | 0.007 | -0.005* | 0.042*** | 0.152*** | 1 |  |  |  |  |  |  |
| SIZE | 0.587*** | 0.262*** | 0.219*** | 0.225*** | 0.245*** | 0.02 | 0.168*** | 0.015 | -0.006 | -0.076*** | 0.278*** | 0.340*** | 1 |  |  |  |  |  |
| OWNS | -0.147*** | -0.090*** | -0.083*** | -0.091*** | -0.034** | -0.109*** | -0.063*** | 0.008 | -0.018 | -0.012 | -0.111*** | -0.117*** | -0.132*** | 1 |  |  |  |  |
| IOWN | 0.521*** | 0.094*** | 0.063*** | 0.063*** | 0.166*** | 0.026 | 0.132*** | -0.016 | -0.015 | -0.019 | 0.126*** | 0.284*** | 0.461*** | -0.360*** | 1 |  |  |  |
| NSEG | 0.059*** | 0.0411** | 0.016 | 0.003 | 0.051** | -0.019 | 0.01 | -0.030* | 0.001 | -0.040** | 0.022 | -0.021 | 0.090*** | 0.002 | 0.063*** | 1 |  |  |
| HSALES | -0.069*** | -0.069*** | -0.060*** | -0.038** | -0.050** | 0.033** | -0.024 | 0.012 | 0.024 | 0.058*** | -0.049*** | -0.038** | -0.127*** | 0.025 | -0.090*** | -0.672*** | 1 |  |
| HASSET | 0.007 | -0.06*** | -0.023 | -0.010 | -0.003 | 0.02 | -0.043* | 0.001 | 0.002 | 0.025 | -0.028* | 0.076*** | -0.023 | -0.062*** | 0.050*** | -0.735*** | 0.643*** | 1 |

***,**,* indicate significant at 1%, 5% and 10% levels, respectively.

Source: Authors’ own calculations.

**Table 5: Regression Results for Model 1a and 1b**

| **DV=AF** | |  |  |  |  | **Model 1a** | **Model 1b** |
| --- | --- | --- | --- | --- | --- | --- | --- |
|  | | | | | | |  |
| EDQ1 | |  |  |  |  | **0.056*** |  |
|  | |  |  |  |  | *1.88* |  |
| EDQ2 | |  |  |  |  | -0.001 |  |
|  | |  |  |  |  | *-0.02* |  |
| EDQ3 | |  |  |  |  | 0.013 |  |
|  | |  |  |  |  | *0.41* |  |
| EDQ4 | |  |  |  |  | **0.172***** |  |
|  | |  |  |  |  | *3.13* |  |
| EDQ5 | |  |  |  |  | **0.111*** |  |
|  | |  |  |  |  | 1.89 |  |
| EDQ6 | |  |  |  |  | -0.016 |  |
|  | |  |  |  |  | *-0.32* |  |
| EDQ7 | |  |  |  |  | 0.352 |  |
|  | |  |  |  |  | 0.84 |  |
| EDQ8 | |  |  |  |  | **0.099***** |  |
|  | |  |  |  |  | 2.91 |  |
| EDQ9 | |  |  |  |  | -0.035 |  |
|  | |  |  |  |  | -0.29 |  |
| EDQSCORE | |  |  |  |  |  | **0.014***** |
|  | |  |  |  |  |  | *3.73* |
| **Control variable** | | | | | | |  |
| FLU | |  |  |  |  | 1.069** | 1.061** |
|  | |  |  |  |  | *2.42* | 2.42 |
| SIZE | |  |  |  |  | 0.366*** | 1.365*** |
|  | |  |  |  |  | *6.98* | *6.93* |
| OWNS | |  |  |  |  | 0.001 | 0.001 |
|  | |  |  |  |  | *0.37* | *0.44* |
| INOWN | |  |  |  |  | 0.026*** | 0.027*** |
|  | |  |  |  |  | *6.16* | *6.18* |
| NSEG | |  |  |  |  | -0.039 | -0.032 |
|  | |  |  |  |  | *-1.07* | *-0.86* |
| HSALES | |  |  |  |  | 0.100 | 0.108 |
|  | |  |  |  |  | *0.45* | *0.49* |
| HASSET | |  |  |  |  | -0.123 | -0.105 |
|  | |  |  |  |  | *-0.63* | *-0.53* |
| Constant | |  |  |  |  | 0.787 | 0.769 |
|  | |  |  |  |  | *0.58* | *0.56* |
| Industry dummy | |  |  |  |  | Yes | Yes |
| R-squared | |  |  |  |  | 58.11% | 57.90% |
| Wald | |  |  |  |  | 304.75*** | 168.87*** |
| Breusch-Pagan | |  |  |  |  | 5,960.40*** | 6,033.51*** |
| White |  |  |  |  |  | 2,517.75*** | 2,250.77*** |
| n |  |  |  |  |  | 3,830 | 3,830 |

****, **, * indicates significance at 1%, 5% and 10% levels, respectively*

Source: Authors’ own calculations.

**Table 6: Regression Results based on Years for Model 1a**

| DV=AF | 2013 | 2014 | 2015 | 2016 | 2017 | 2018 | 2019 | 2020 | 2021 | 2022 |
| --- | --- | --- | --- | --- | --- | --- | --- | --- | --- | --- |
|  |  |  |  |  |  |  |  |  |  |  |
| EDQ1 | -0.020 | -0.007 | -0.051 | -0.163 | 0.037 | 0.054 | 0.092 | 0.090 | 0.105 | **0.202*** |
|  | -0.15 | -0.05 | -0.44 | -1.47 | 0.33 | 0.56 | 0.83 | 0.78 | 0.94 | 1.77 |
| EDQ2 | 0.000 | 0.112 | 0.027 | -0.015 | 0.137 | -0.288 | -0.006 | **-0.483**** | -0.069 | -0.071 |
|  | 0.00 | 1.08 | 0.25 | -0.11 | 0.84 | -1.59 | -0.03 | -2.30 | -0.37 | -0.38 |
| EDQ3 | -0.131 | -**0.197**** | -0.050 | -0.44 | -**0.332***** | -0.187 | -0.247 | 0.264 | -0.085 | -0.041 |
|  | -1.34 | -2.05 | -0.50 | -0.43 | -2.81 | -1.47 | -1.50 | 1.46 | -0.50 | -0.23 |
| EDQ4 | 0.053 | **0.192*** | 0.095 | **0.230**** | **0.253**** | **0.212**** | 0.163 | 0.042 | 0.075 | **0.141*** |
|  | 0.47 | 1.80 | 0.95 | 2.35 | 2.47 | 2.27 | 1.61 | 0.43 | 0.86 | 1.71 |
| EDQ5 | 0.078 | 0.010 | -0.024 | 0.026 | 0.050 | -0.004 | -0.019 | -0.004 | 0.004 | 0.105 |
|  | 0.41 | 0.06 | -0.13 | 0.15 | 0.30 | -0.03 | -0.14 | -0.03 | 0.03 | 1.12 |
| EDQ6 | 0.077 | 0.473* | **0.446*** | 0.313 | 0.140 | 0.183 | 0.162 | 0.124 | -0.086 | -**0.277***** |
|  | 0.22 | 1.81 | 1.66 | 1.56 | 0.85 | 1.49 | 1.36 | 1.10 | -0.86 | -2.77 |
| EDQ7 |  |  |  |  |  |  | 2.027 | 0.272 | **1.343***** | **1.213**** |
|  |  |  |  |  |  |  | 1.20 | 0.69 | 2.67 | 2.49 |
| EDQ8 |  |  |  |  |  |  |  |  | -0.050 | -0.228 |
|  |  |  |  |  |  |  |  |  | -0.07 | -0.31 |
| EDQ9 | 0.038 | -0.035 | 0.012 | 0.158 | -0.113 | -0.050 | -0.185 | -0.097 | -0.174 | -0.109 |
|  | 0.15 | -0.16 | 0.06 | 0.74 | -0.50 | -0.26 | -0.82 | -0.44 | -0.88 | -0.56 |
| **Control variables** |  |  |  |  |  |  |  |  |  |  |
| FLU | 3.063*** | 3.931*** | 4.623*** | 4.683*** | 1.920*** | 3.915*** | 2.095*** | 1.737*** | 1.466*** | 1.440*** |
|  | 9.08 | 9.81 | 10.96 | 9.14 | 5.59 | 8.14 | 5.49 | 6.54 | 6.28 | 6.16 |
| SIZE | 0.377*** | 0.390*** | 0.320*** | 0.372*** | 0.599*** | 0.501*** | 0.604*** | 0.579*** | 0.457*** | 0.398*** |
|  | 6.06 | 5.55 | 4.44 | 5.15 | 7.34 | 6.46 | 7.27 | 6.86 | 6.65 | 6.50 |
| OWNS | 0.003 | 0.001 | 0.002 | 0.000 | 0.006 | 0.003 | 0.005 | 0.004 | 0.005 | 0.008** |
|  | 0.81 | 0.40 | 0.49 | 0.10 | 1.42 | 0.75 | 1.14 | 0.88 | 1.52 | 2.52 |
| INOWN | 0.024*** | 0.024*** | 0.027*** | 0.26*** | 0.0312*** | 0.035*** | 0.036*** | 0.044*** | 0.058*** | 0.071*** |
|  | 5.00 | 4.68 | 5.17 | 4.74 | 5.17 | 6.29 | 5.85 | 7.10 | 10.48 | 11.22 |
| NSEG | 0.088 | 0.089 | 0.134* | 0.103 | -0.005 | -0.092 | -0.039 | -0.032 | 0.064 | -0.119 |
|  | 1.21 | 1.16 | 1.76 | 1.26 | -0.05 | -1.02 | -0.41 | -0.35 | 0.82 | -1.51 |
| HSALES | 0.101 | 0.669 | -0.018 | 0.263 | 0.776 | 0.424 | 0.997* | 0.557 | 0.812* | 0.523 |
|  | 0.25 | 1.63 | -0.04 | 0.58 | 1.48 | 0.86 | 1.86 | 1.05 | 1.82 | 1.14 |
| HASSET | 0.133 | -0.216 | 0.482 | 0.234 | -0.450 | -0.515 | -0.656 | -0.489 | -0.159 | -1.104*** |
|  | 0.35 | -0.53 | 1.12 | 0.58 | -0.92 | -1.07 | -1.29 | -0.96 | -0.35 | -2.65 |
| Constant | -2.840*** | -3.890*** | -2.113** | -0.953 | -1.474 | -0.0512 | -1.103 | -0.476 | -1.107 | 4.752*** |
|  | -3.05 | -4.02 | -2.16 | -0.90 | -1.22 | -0.04 | -0.84 | -0.37 | -1.02 | 3.86 |
| Industry dummy | Yes | Yes | Yes | Yes | Yes | Yes | Yes | Yes | Yes | Yes |
| R-squared | 57.02% | 60.16% | 62.02% | 59.40% | 56.18% | 61.38% | 55.24% | 58.02% | 63.02% | 61.49% |
| n | 383 | 383 | 383 | 383 | 383 | 383 | 383 | 383 | 383 | 383 |

****, **, * indicates significance at 1%, 5% and 10% levels, respectively*

Source: Authors’ own calculations.

**Table 7: Regression Results based on Years for Model 1b**

| DV=AF | 2013 | 2014 | 2015 | 2016 | 2017 | 2018 | 2019 | 2020 | 2021 | 2022 |
| --- | --- | --- | --- | --- | --- | --- | --- | --- | --- | --- |
|  |  |  |  |  |  |  |  |  |  |  |
| EDQSCORE | -0.012 | -0.001 | 0.001 | 0.002 | -0.004 | -0.007 | 0.008 | 0.004 | -0.001 | 0.006 |
|  | -1.18 | -0.05 | 0.10 | 0.19 | -0.37 | -0.65 | 0.67 | 0.36 | -0.08 | 0.54 |
| **Control variables** |  |  |  |  |  |  |  |  |  |  |
| FLU | 3.081*** | 4.027*** | 4.722*** | 4.809*** | 1.899*** | 4.092*** | 2.067*** | 1.700*** | 1.451*** | 1.44*** |
|  | 9.30 | 10.09 | 11.39 | 9.41 | 5.66 | 8.64 | 5.53 | 6.43 | 6.27 | 6.13 |
| SIZE | 0.369*** | 0.375*** | 0.304*** | 0.360*** | 0.609*** | 0.488*** | 0.624*** | 0.589*** | 0.471*** | 0.389*** |
|  | 6.04 | 5.45 | 4.32 | 5.00 | 7.53 | 6.38 | 7.70 | 7.13 | 6.96 | 6.13 |
| OWNS | 0.002 | 0.001 | 0.002 | 0.001 | 0.007* | 0.004 | 0.006 | 0.005 | 0.006* | 0.008** |
|  | 0.74 | 0.43 | 0.49 | 0.26 | 1.69 | 1.06 | 1.48 | 1.31 | 1.68 | 2.51 |
| INOWN | 0.025*** | 0.026*** | 0.028*** | 0.027*** | 0.035*** | 0.038*** | 0.038*** | 0.045*** | 0.057*** | 0.068*** |
|  | 5.28 | 5.12 | 5.51 | 5.03 | 6.00 | 6.76 | 6.06 | 7.40 | 10.43 | 10.87 |
| NSEG | 0.082 | 0.083 | 0.142* | 0.114 | 0.004 | -0.051 | -0.036 | -0.040 | 0.057 | -0.096 |
|  | 1.13 | 1.08 | 1.89 | 1.41 | 0.04 | -0.57 | -0.37 | -0.43 | 0.73 | -1.23 |
| HSALES | 0.118 | 0.604 | -0.080 | 0.293 | 0.849 | 0.602 | 0.970* | 0.580 | 0.806* | 0.494 |
|  | 0.30 | 1.48 | -0.18 | 0.65 | 1.63 | 1.22 | 1.81 | 1.09 | 1.81 | 1.07 |
| HASSET | 0.103 | -0.238 | 0.535 | 0.283 | -0.488 | -0.521 | -0.703 | -0.473 | -0.231 | -0.999** |
|  | 0.27 | -0.59 | 1.27 | 0.64 | -0.99 | -1.08 | -1.39 | -0.93 | -0.51 | -2.40 |
| Constant | -2.787*** | -3.726*** | -2.025** | -1.108 | -1.775 | -1.182 | -1.78 | -1.087 | -1.268 | 1.018 |
|  | -3.03 | -3.87 | -2.10 | -1.06 | -1.48 | -1.02 | -1.42 | -0.89 | -1.21 | 1.05 |
| Industry dummy | Yes | Yes | Yes | Yes | Yes | Yes | Yes | Yes | Yes | Yes |
| R-squared | 56.80% | 59.12% | 61.60% | 58.31% | 54.47% | 59.78% | 53.96% | 57.11% | 61.91% | 59.43% |
| n | 383 | 383 | 383 | 383 | 383 | 383 | 383 | 383 | 383 | 383 |

****, **, * indicates significance at 1%, 5% and 10% levels, respectively*

Source: Authors’ own calculations.

**Table 8: Regression Results based Periods for Model 1a and Model 2a**

| DV=AF | Model 1a |  |  |  |
| --- | --- | --- | --- | --- |
|  | Pre-pandemic | Pandemic | Post-pandemic |  |
|  | Year =2013-2018 | Year =2019-2020 | Year=2021-2022 | Model 2a |
| PERIOD |  |  |  | **-0.060**** |
|  |  |  |  | -1.98 |
| EDQ1 | **0.069**** | 0.100 | 0.120 | **0.074**** |
|  | 2.42 | 1.47 | 1.31 | 2.37 |
| EDQ2 | 0.033 | -0.184 | -0.11 | 0.007 |
|  | 0.99 | -1.59 | -0.07 | 0.16 |
| EDQ3 | -0.018 | 0.076 | -0.095 | 0.022 |
|  | -0.65 | 0.81 | -0.72 | 0.68 |
| EDQ4 | **0.214***** | 0.065 | **0.175**** | **0.177***** |
|  | 6.04 | 0.89 | 2.32 | 3.21 |
| EDQ5 | **0.108**** | 0.020 | 0.075 | **0.112*** |
|  | 2.07 | 0.23 | 0.92 | 3.21 |
| EDQ6 | **0.161***** | -0.003 | -0.021 | 0.004 |
|  | 3.48 | -0.005 | -0.24 | 0.08 |
| EDQ7 | 0.225 | -0.049 | **1.210**** | 0.353 |
|  | 0.61 | -0.29 | 2.47 | 0.83 |
| EDQ8 |  |  | -0.235 | **0.118***** |
|  |  |  | -0.32 | 3.40 |
| EDQ9 | -0.039 | -0.51 | -0.160 | -0.036 |
|  | -0.40 | -0.22 | -0.95 | -0.29 |
| **Control variables** |  |  |  |  |
| FLU | 1.314*** | 0.443*** | 1.958*** | 1.065** |
|  | 12.14 | 4.09 | 10.92 | 2.42 |
| SIZE | 0.432*** | 0.439*** | 0.290*** | 0.372*** |
|  | 12.98 | 7.41 | 6.22 | 7.12 |
| OWNS | 0.002 | 0.002 | 0.001 | 0.000 |
|  | 1.23 | 0.89 | 0.37 | 0.22 |
| INOWN | 0.026*** | 0.036*** | 0.035*** | 0.025*** |
|  | 10.18 | 7.66 | 8.85 | 5.78 |
| NSEG | -0.043 | 0.024 | -0.016 | -0.040 |
|  | -1.18 | 0.36 | -0.29 | -1.09 |
| HSALES | -0.100 | 0.103 | 0.435 | 0.110 |
|  | -0.60 | 0.35 | 1.53 | 0.50 |
| HASSET | 0.039 | 0.019 | -0.382 | -0.148 |
|  | 0.22 | 0.06 | -1.30 | -0.75 |
| Constant | -0.477 | 0.610 | 1.785** | 0.824 |
|  | -0.70 | 0.58 | 2.03 | 0.60 |
| Industry dummy | Yes | Yes | Yes | Yes |
| R-squared | 57.05% | 52.72% | 60.53% | 57.89% |
| n | 2,298 | 766 | 766 | 3,830 |

****, **, * indicates significance at 1%, 5% and 10% levels, respectively*

Source: Authors’ own calculations.

**Table 9: Regression Results based on Periods for Model 1b and 2b**

| DV=AF | Model 1b |  |  |  |
| --- | --- | --- | --- | --- |
|  | Pre-pandemic | Pandemic | Post-pandemic |  |
|  | 2013-2018 | 2019-2020 | 2021-2022 | Model 2b |
| PERIOD |  |  |  | **-0.071**** |
|  |  |  |  | -2.39 |
| EDQSCORE | **0.021***** | 0.005 | **0.015*** | **0.019***** |
|  | 8.15 | 0.63 | 1.71 | 4.30 |
| **Control variables** |  |  |  |  |
| FLU | 1.302*** | 0.444*** | 1.973*** | 1.056** |
|  | 12.12 | 4.13 | 11.01 | 2.42 |
| SIZE | 0.437*** | 0.449*** | 0.290*** | 0.373*** |
|  | 13.16 | 7.68 | 6.26 | 7.09 |
| OWNS | 0.002 | 0.003 | 0.001 | 0.000 |
|  | 1.28 | 0.95 | 0.46 | 0.26 |
| INOWN | 0.027*** | 0.036*** | 0.035*** | 0.025*** |
|  | 10.47 | 7.66 | 8.79 | 5.80 |
| NSEG | -0.042 | 0.019 | -0.017 | -0.033 |
|  | -1.16 | 0.28 | -0.31 | -0.90 |
| HSALES | -0.073 | 0.095 | 0.392 | 0.120 |
|  | -0.43 | 0.32 | 1.38 | 0.54 |
| HASSET | 0.031 | 0.019 | -0.396 | 0.136 |
|  | 0.18 | 0.06 | -1.35 | -0.68 |
| Constant | -0.574 | 0.398 | 1.617* | 0.801 |
|  | -0.85 | 0.38 | 1.89 | 0.58 |
| Industry dummy | Yes | Yes | Yes | Yes |
| R-squared | 56.18% | 52.53% | 59.15% | 57.61% |
| n | 2,298 | 766 | 766 | 3,830 |

****, **, * indicates significance at 1%, 5% and 10% levels, respectively*

Source: Authors’ own calculations.
